# Supplementary material for: Genome-wide association study of clinically defined gout identifies multiple risk loci and its association with clinical subtypes
Source: HighWire-hosted journal article supplement (doi:10.1136/annrheumdis-2014-206191), 2015-02-03
Supplement: annrheumdis-2014-206191supp.pdf [file annrheumdis-2014-206191supp.pdf]

## Supplementary Materials:

**Supplementary Figure S1** Classification of gout.

**Supplementary Figure S2** Result of principal component analysis including case and control samples used in this GWAS and four HapMap populations.

**Supplementary Figure S3** Quantile-Quantile plot of p value distribution for association.

**Supplementary Figure S4** Regional association plots for six discovered loci (Larger version of Figure 2).

**Supplementary Figure S5** Cumulative effect of six gout-associated SNPs for developing gout.

**Supplementary Figure S6** Relationship between clinical parameters ( $FE_{UA}$  and UUE) and the SNPs of *SLC2A9* and *ABCG2*.

**Supplementary Figure S7** Extended regional association plot of *MYL2-CUX2* locus.

**Supplementary Table S1** Clinical characteristics of case and control.

**Supplementary Table S2** Clinical parameters for each specific type of gout patient.

**Supplementary Table S3** Concomitant diseases of gout patients.

**Supplementary Table S4** Summary of GWAS and replication study of 16 SNPs.

**Supplementary Table S5** Power of the present study design.

**Supplementary Table S6A** Imputation analysis near *MYL2-CUX2* locus.

**Supplementary Table S6B** Imputation analysis near *GCKR* locus.

**Supplementary Table S6C** Imputation analysis near *CNIH-2* locus.

**Supplementary Table S6D** Imputation analysis near *MAP3K11* locus.

**Supplementary Table S7A** Univariate and multivariate logistic regression including three SNPs of *ABCG2*.

**Supplementary Table S7B** Association analysis of gout with *ABCG2* dysfunctional missense variants.

**Supplementary Table S8** Magnitude of gout risk associated with the number of risk alleles.

**Supplementary Table S9** Association analysis between seven SNPs and three uric acid-related parameters.

**Supplementary Table S10** Linkage disequilibrium among rs4073582 of *CNIH-2*, rs10791821 of *MAP3K11*, and rs504915 of *NRXN2*.

**Supplementary Table S11** Multivariate logistic regression analysis adjusted with rs504915 of *NRXN2*.

## **Supplementary Methods**

### **References for Supplementary Methods**

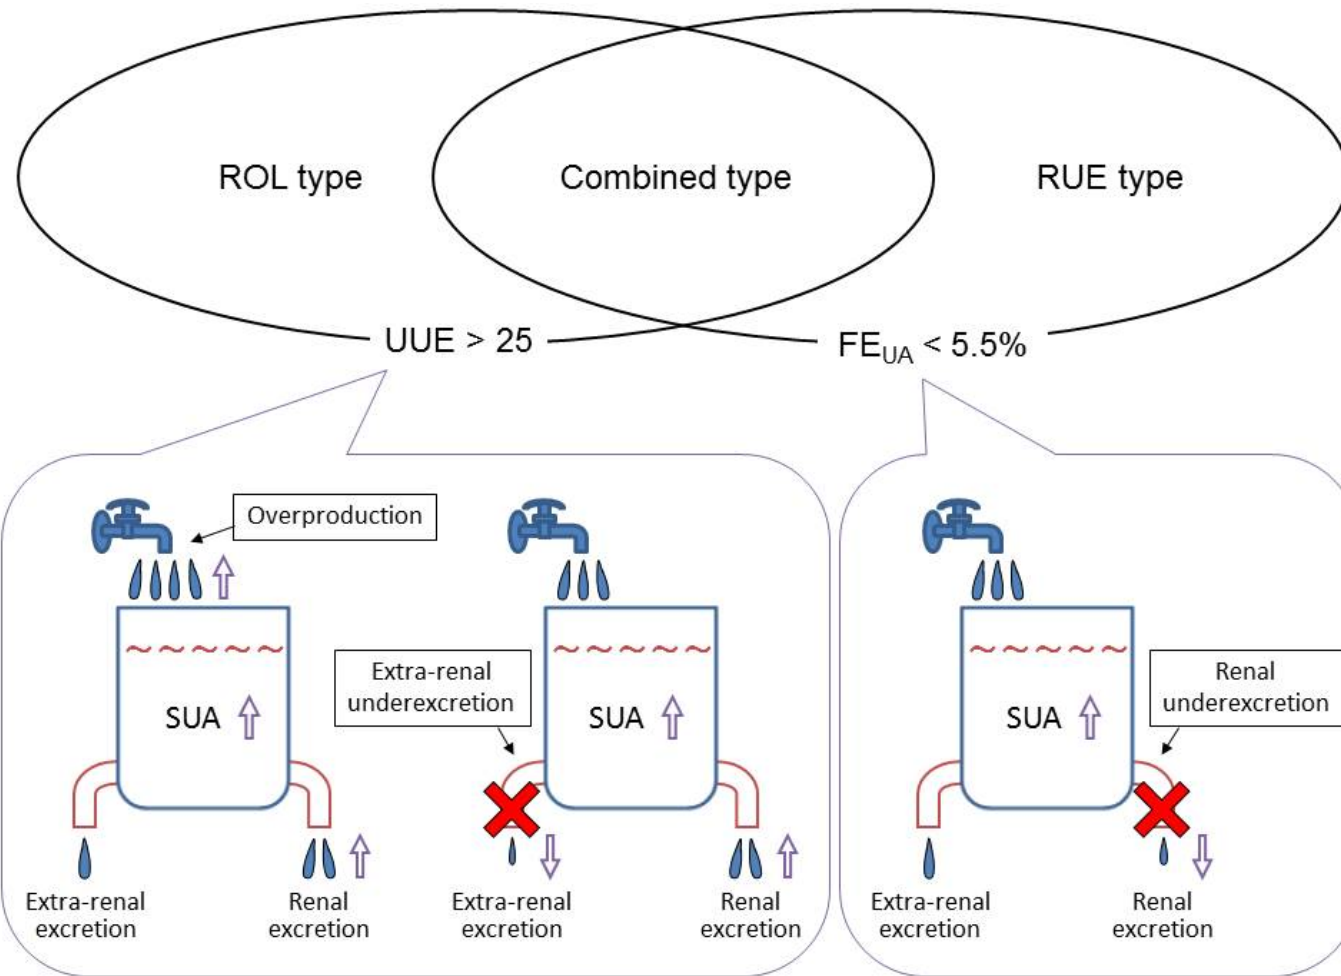

### Supplementary Figure S1 Classification of gout.

Gout can be pathophysiologically classified into the 'renal overload' (ROL) type, the 'renal underexcretion' (RUE) type, or the combined type, based on the clinical parameters,  $UUE$  and  $FE_{UA}$ . The unit of  $UUE$  is 'mg/hr/1.73m<sup>2</sup>.' Urate is an end-product of purine metabolism, and excreted from kidney (renal excretion pathway) or from extra-renal tissues (extra-renal excretion pathway). Therefore, elevated SUA with high  $UUE$  ( $>25$  mg/hr/1.73m<sup>2</sup>) is caused by renal urate overload (overproduction and/or extra-renal underexcretion of urate), while increased SUA with low  $FE_{UA}$  ( $<5.5\%$ ) results from renal urate underexcretion. SUA, serum uric acid.  $UUE$ , urinary urate excretion.  $FE_{UA}$ , fractional excretion of urate clearance.

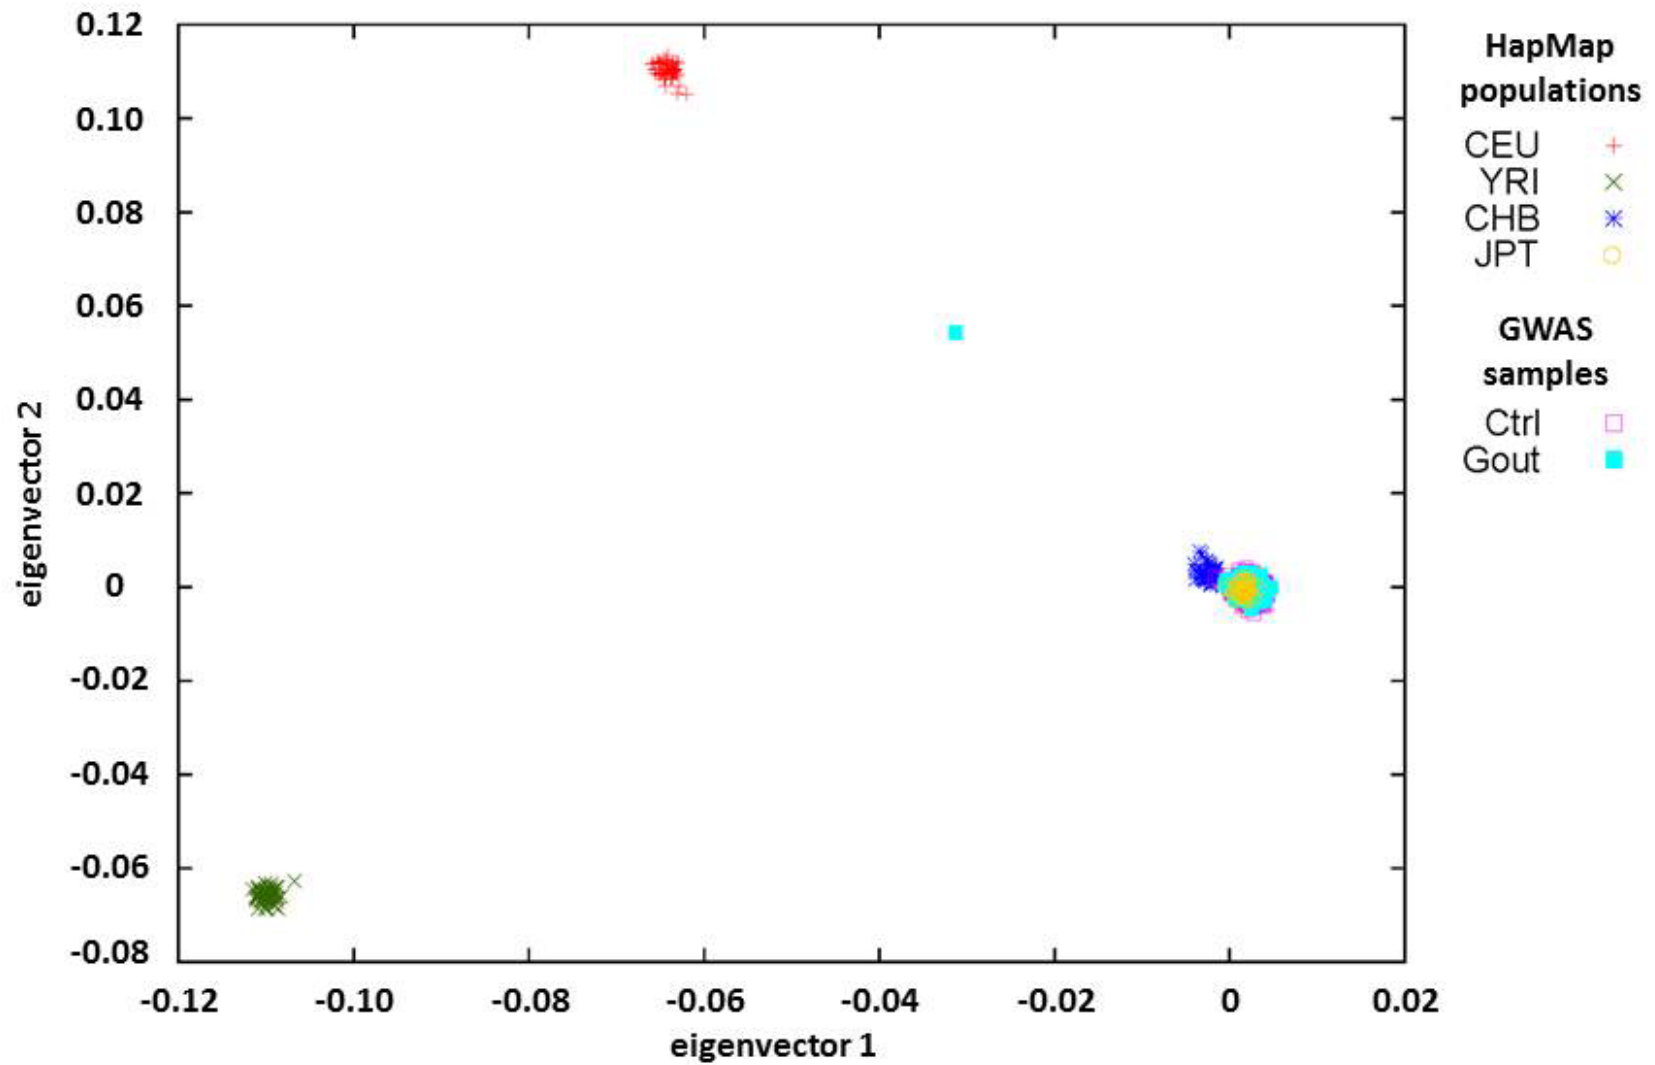

**Supplementary Figure S2** Result of principal component analysis including case and control samples used in this GWAS and four HapMap populations. JPT, Japanese in Tokyo, Japan. CEU, CEPH (Utah residents with ancestry from northern and western Europe). YRI, Yoruba in Ibadan, Nigeria. CHB, Han Chinese in Beijing, China.

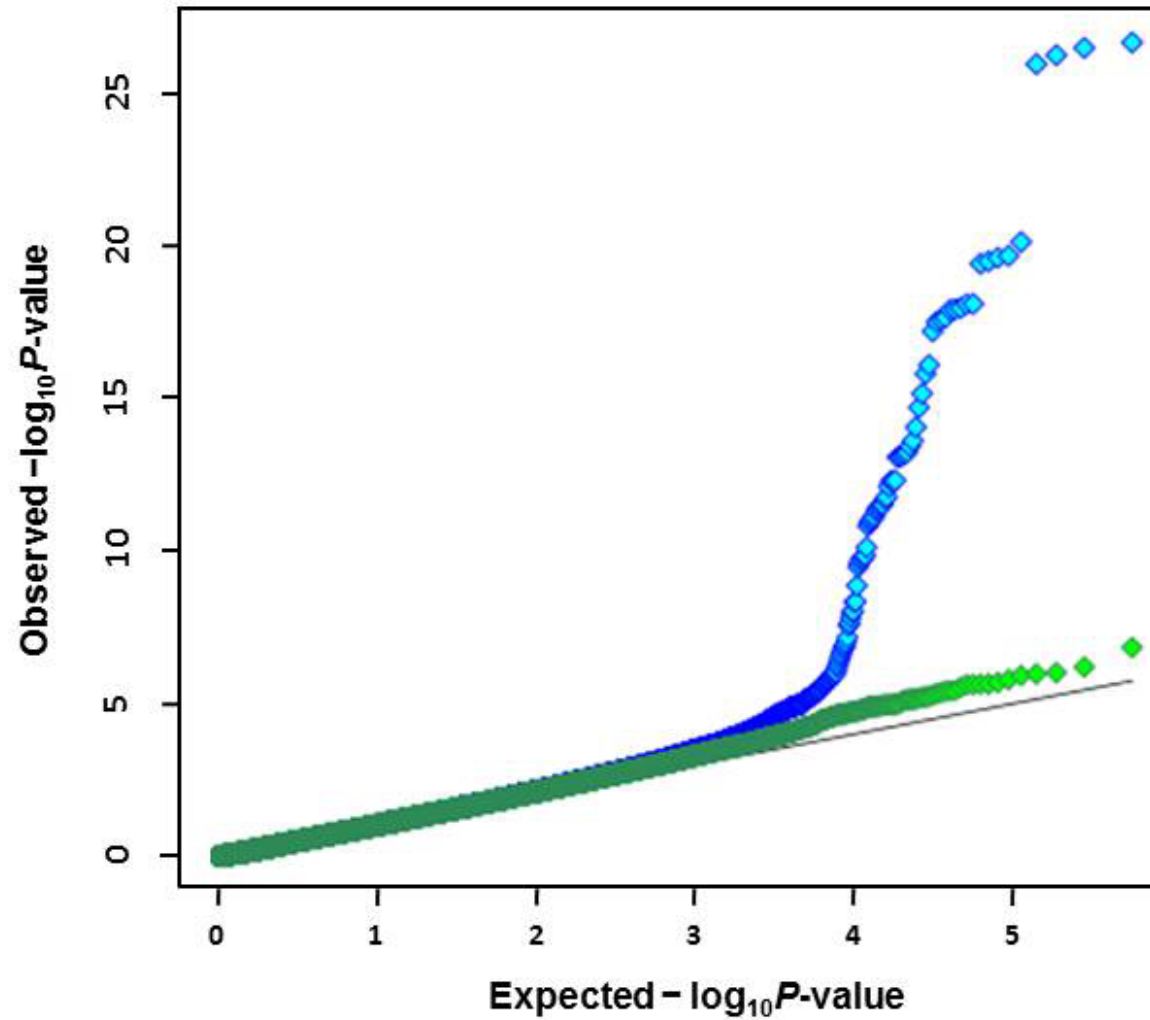

**Supplementary Figure S3** Quantile-Quantile plot of p value distribution for association.

Results for all SNPs tested are plotted in blue. Results excluding SNPs within 500 kb from the SNPs strongly associated at  $p < 5.0 \times 10^{-8}$  (rs2728125 of *ABCG2*, rs3775948 of *SLC2A9*, and rs2188380 of *MYL2-CUX2*) are plotted in green.

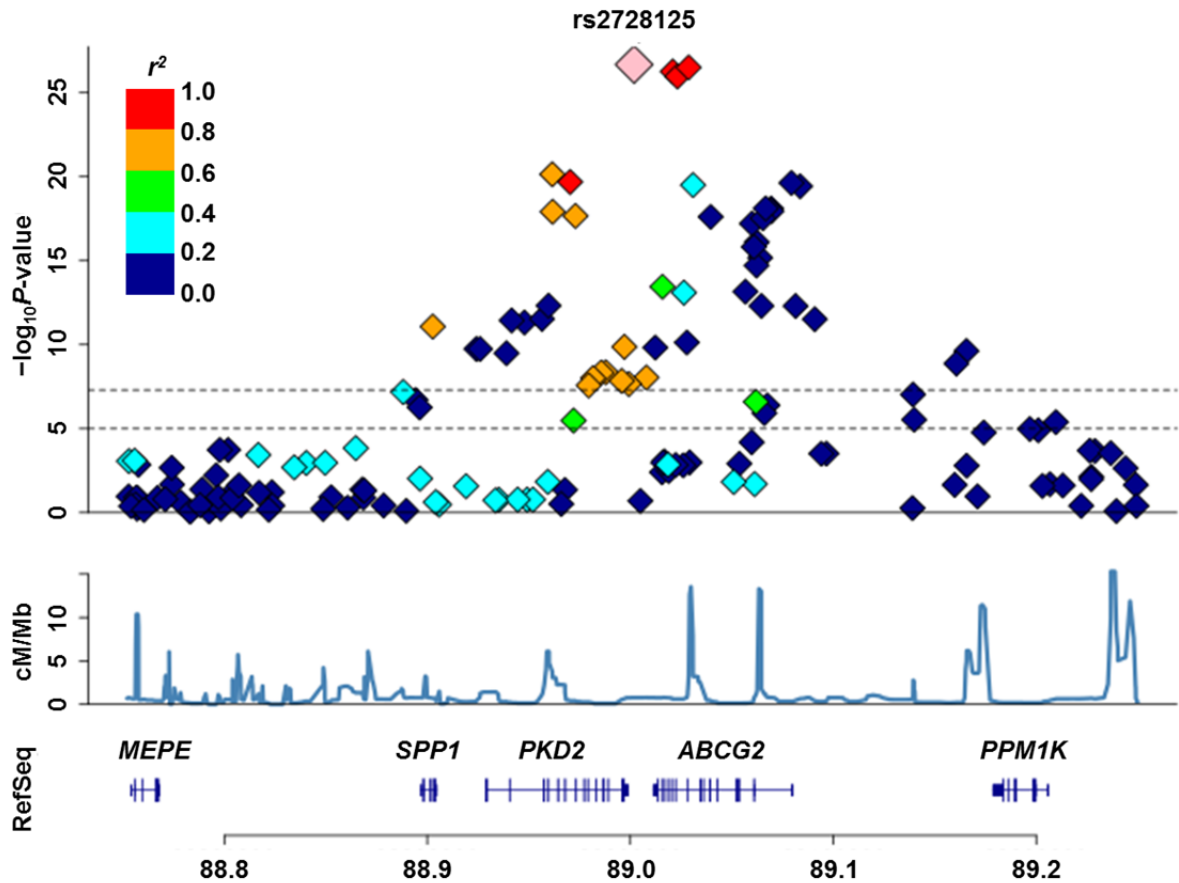

Supplementary Figure S4A Regional association plots for six discovered loci (Larger version of Figure 2A; ABCG2 locus).

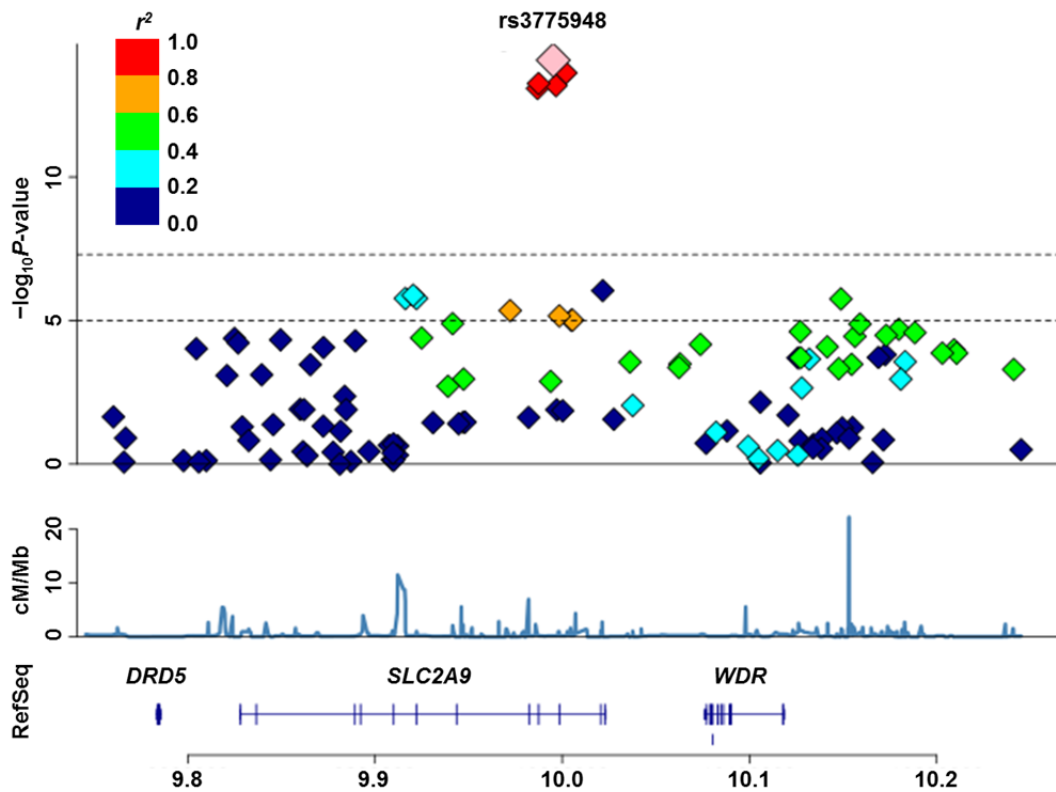

Supplementary Figure S4B Regional association plots for six discovered loci (Larger version of Figure 2B; SCL2A9 locus).

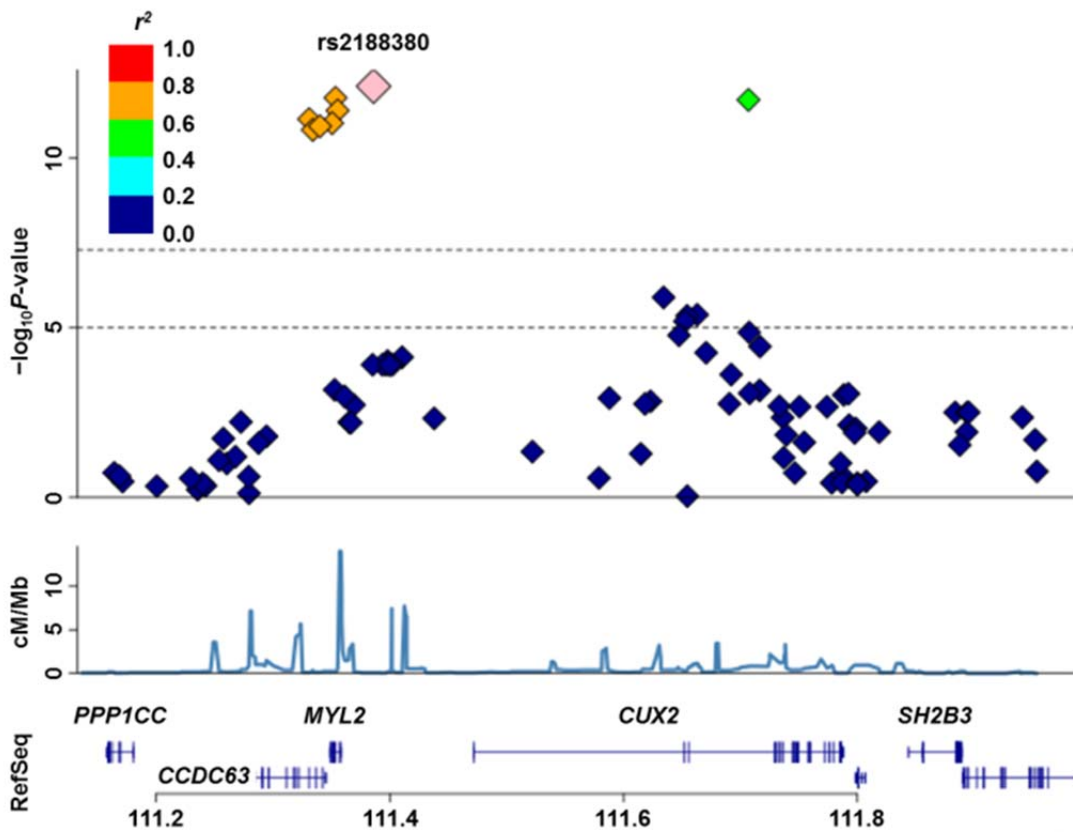

Supplementary Figure S4C Regional association plots for six discovered loci (Larger version of Figure 2C; MYL2-CUX2 locus).

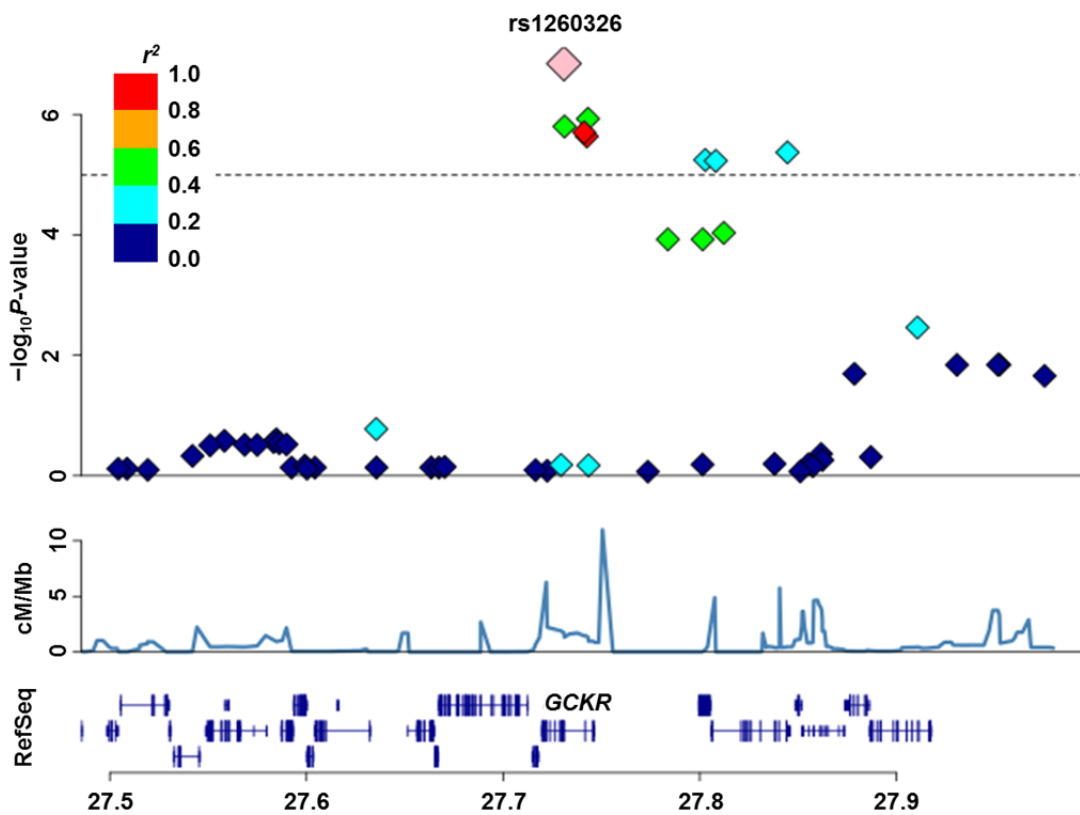

Supplementary Figure S4D Regional association plots for six discovered loci (Larger version of Figure 2D; GCKR locus).

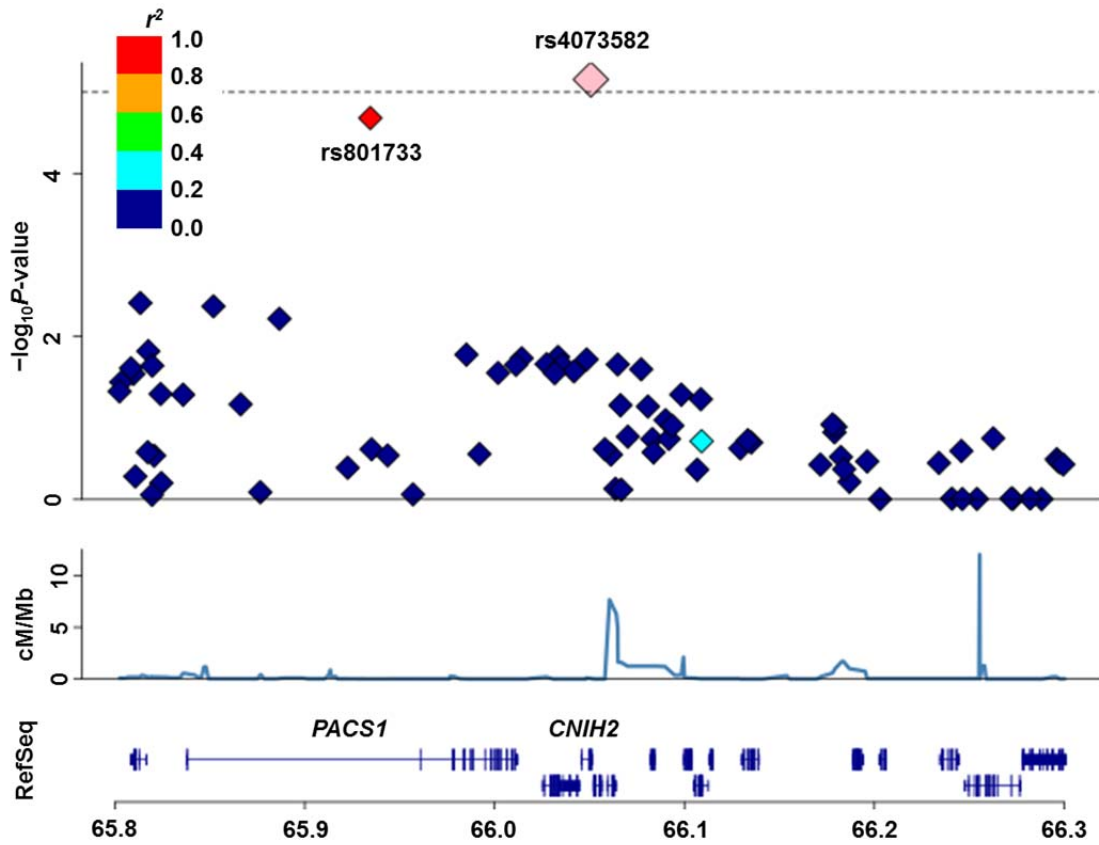

Supplementary Figure S4E Regional association plots for six discovered loci (Larger version of Figure 2E; *CNIH-2* locus).

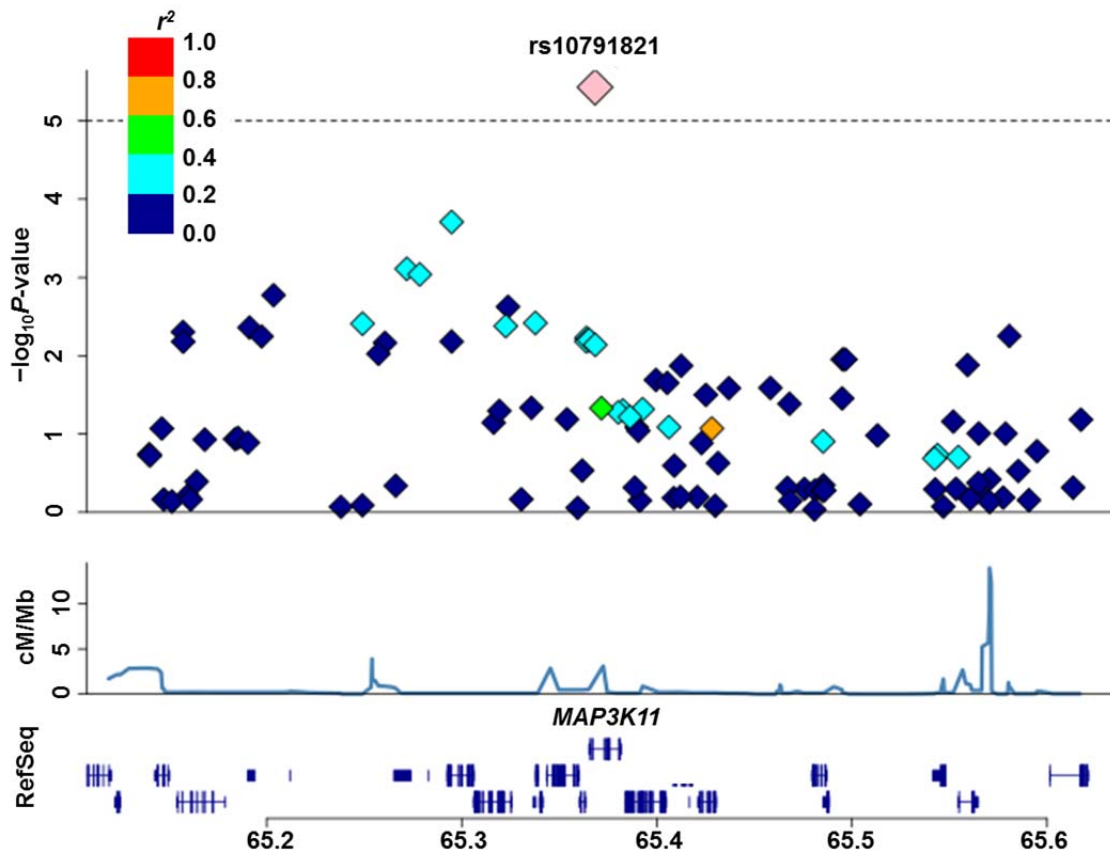

Supplementary Figure S4F Regional association plots for six discovered loci (Larger version of Figure 2F; *MAP3K11* locus).



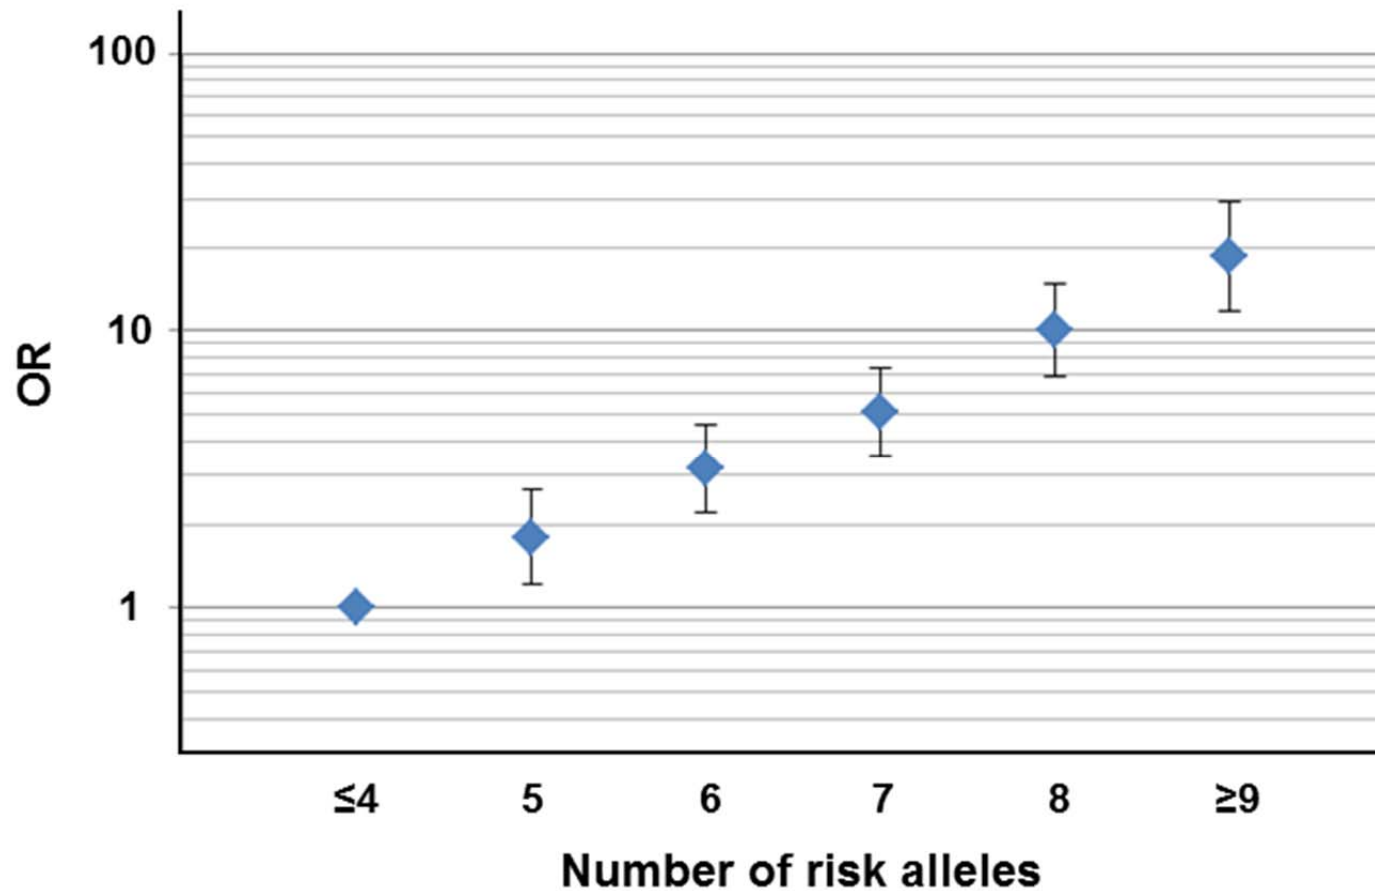

**Supplementary Figure S5 Cumulative effect of six gout-associated SNPs for developing gout.**

A genetic risk score was defined as the number of risk alleles over the following six SNPs: four SNPs identified by the present study (rs3775948 of *SLC2A9*, rs2188380 of *MYL2-CUX2*, rs1260326 [Leu446Pro] of *GCKR*, and rs4073582 of *CNIH-2*) and two nonsynonymous SNPs (rs72552713 [Gln126Ter] and rs2231142 [Gln141Lys] of *ABCG2*), which have been established as strong gout risk SNPs.

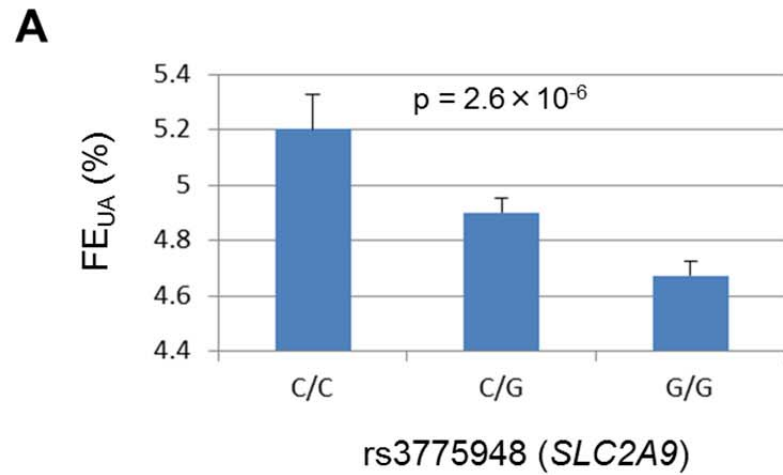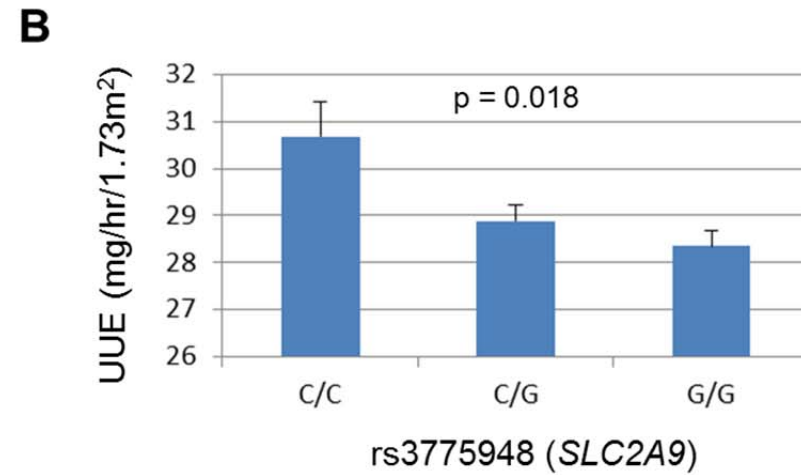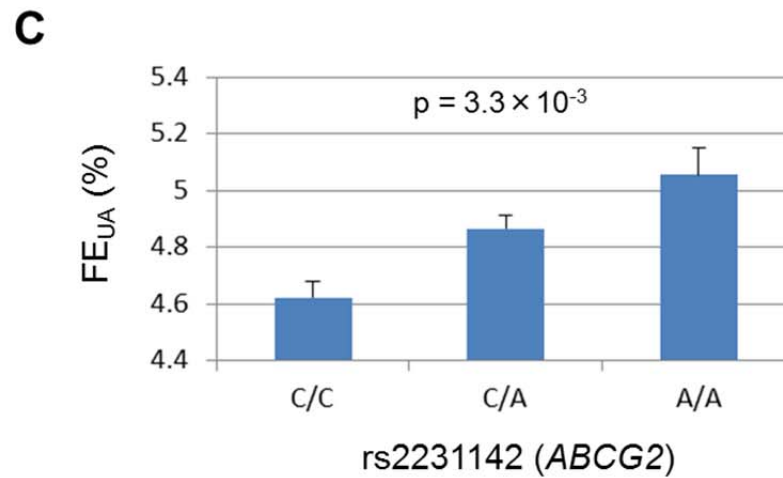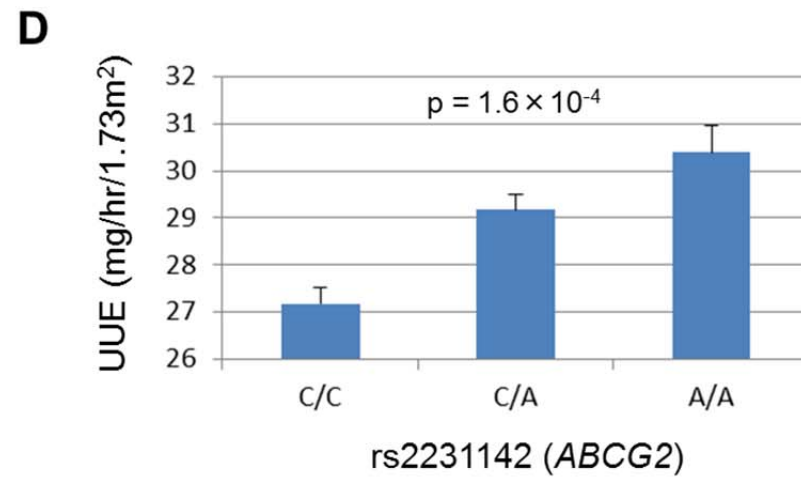

**Supplementary Figure S6 Relationship between clinical parameters (FE<sub>UA</sub> and UUE) and the SNPs of *SLC2A9* and *ABCG2*.**

FE<sub>UA</sub> and UUE significantly decreased as the risk allele of *SLC2A9* (rs3775948) increased (A, B), whereas they increased as the risk allele of *ABCG2* (rs2231142) increased (C, D). Because RUE type and ROL type are defined by FE<sub>UA</sub> and UUE (Supplementary Figure S1), these are consistent with the results shown in Supplementary Table S9. All bars show mean ± SEM.

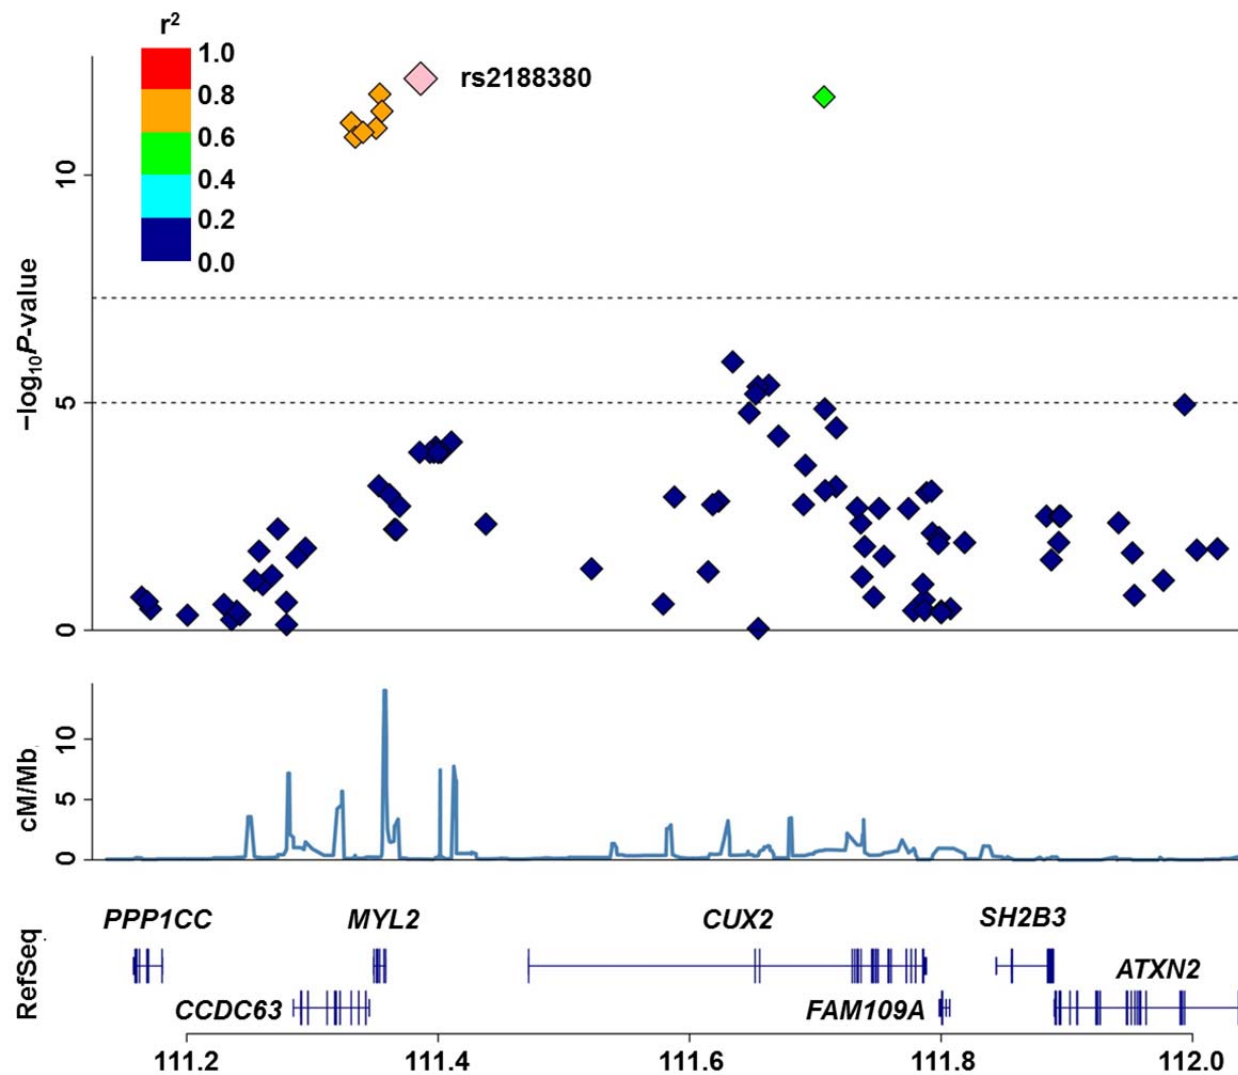

**Supplementary Figure S7** Extended regional association plot of *MYL2-CUX2* locus.

Near rs2188380 of *MYL2-CUX2*, there is rs653178 of *ATXN2*, which was previously reported in European ancestry to have an association with SUA, although rs653178 is monomorphic in a Japanese population. Conversely, rs2188380 identified in the present study with Japanese is monomorphic in European and African populations.

**Supplementary Table S1** Clinical characteristics of case and control

|                                      | GWAS stage  |            | Replication stage |            |
|--------------------------------------|-------------|------------|-------------------|------------|
|                                      | Case        | Control    | Case              | Control    |
| Number                               | 945         | 1213       | 1048              | 1334       |
| Age (year)                           | 46.5 ± 11.2 | 65.8 ± 8.4 | 44.9 ± 11.4       | 52.4 ± 8.6 |
| Body-mass index (kg/m <sup>2</sup> ) | 25.1 ± 3.6  | 21.8 ± 3.3 | 25.0 ± 3.5        | 23.2 ± 2.7 |
| Serum uric acid (mg/dl)              | 8.5 ± 1.2   | 5.5 ± 1.1  | 8.6 ± 1.3         | 5.6 ± 0.9  |

Plus-minus values are means ± SD

**Supplementary Table S2** Clinical parameters for each specific type of gout patient

|               | Number (%)  | SUA         | FE <sub>UA</sub> | UUE        |
|---------------|-------------|-------------|------------------|------------|
| ROL type      | 375 (23.2%) | 8.18 ± 1.10 | 6.73 ± 1.25      | 35.8 ± 8.3 |
| RUE type      | 509 (31.6%) | 8.38 ± 1.16 | 3.84 ± 0.79      | 20.5 ± 3.5 |
| Combined type | 664 (41.2%) | 8.83 ± 1.25 | 4.40 ± 0.70      | 31.8 ± 6.9 |
| Normal type   | 65 (4.0%)   | 7.72 ± 1.12 | 6.46 ± 0.90      | 21.2 ± 3.5 |
| All           | 1613 (100%) | 8.49 ± 1.22 | 4.85 ± 1.46      | 28.7 ± 8.9 |

Plus-minus values are means ± SD

SUA, serum uric acid; FE<sub>UA</sub>, fractional excretion of urate clearance; UUE, urinary urate excretion; ROL, renal overload; RUE, renal underexcretion.

Among 1993 clinically-defined cases, 1613 patients had information such as clinical parameters (UUE and FE<sub>UA</sub>) to classify their clinical subtypes.

**Supplementary Table S3** Concomitant diseases of gout patients

| Number (%)        | Hypertension | Dyslipidemia | Diabetes mellitus | Ischemic heart disease | Stroke     | Renal impairment* |
|-------------------|--------------|--------------|-------------------|------------------------|------------|-------------------|
| GWAS stage        | 249 (26.3%)  | 42 (4.4%)    | 37 (3.9%)         | 19 (2.0%)              | 9 (0.95%)  | 11 (1.2%)         |
| Replication stage | 317 (30.2%)  | 58 (5.5%)    | 42 (4.0%)         | 26 (2.5%)              | 9 (0.86%)  | 4 (0.38%)         |
| All               | 566 (28.4%)  | 100 (5.0%)   | 79 (4.0%)         | 45 (2.3%)              | 18 (0.90%) | 15 (0.75%)        |

\*Renal impairment is defined with high serum creatinine ( $\geq 1.5$  mg/dl).

**Supplementary Table S4** Summary of GWAS and replication study of 16 SNPs

| SNP*          | Chr. | Position (bp) <sup>†</sup> | Gene                  | A1/A2 <sup>‡</sup> | GWAS <sup>§</sup> |          |                  |                       | Replication study <sup>  </sup> |          |                  |                             | Meta-analysis <sup>††</sup> |                             | Heterogeneity        |                    |
|---------------|------|----------------------------|-----------------------|--------------------|-------------------|----------|------------------|-----------------------|---------------------------------|----------|------------------|-----------------------------|-----------------------------|-----------------------------|----------------------|--------------------|
|               |      |                            |                       |                    | Freq.             |          | OR (95% CI)      | p Value               | Freq.                           |          | OR (95% CI)      | p Value <sup>‡‡</sup>       | OR (95% CI)                 | p Value <sup>§</sup>        | Cochran's Q          | I <sup>2</sup> (%) |
|               |      |                            |                       |                    | Cases             | Controls |                  |                       | Cases                           | Controls |                  |                             |                             |                             |                      |                    |
| rs1260326**   | 2    | 27730940                   | <i>GCKR</i>           | T/C                | 0.62              | 0.54     | 1.39 (1.23-1.57) | 1.2×10 <sup>-7</sup>  | 0.61                            | 0.55     | 1.32 (1.18-1.49) | <b>2.8×10<sup>-6</sup></b>  | 1.36 (1.25-1.48)            | <b>1.9×10<sup>-12</sup></b> | 0.57                 | 0                  |
| rs16835687    | 3    | 124327247                  | <i>KALRN</i>          | G/A                | 0.17              | 0.12     | 1.48 (1.24-1.75) | 7.8×10 <sup>-6</sup>  | 0.15                            | 0.12     | 1.22 (1.03-1.45) | 0.019                       | 1.34 (1.12-1.62)            | 1.9×10 <sup>-3</sup>        | 0.12                 | 58.2               |
| rs4637240     | 3    | 127150025                  | <i>PLXNA1-TPRA1</i>   | C/T                | 0.87              | 0.81     | 1.5 (1.27-1.77)  | 1.8×10 <sup>-6</sup>  | 0.84                            | 0.83     | 1.08 (0.92-1.26) | 0.35                        | 1.27 (0.92-1.76)            | 0.15                        | 4.3×10 <sup>-3</sup> | 87.7               |
| rs3775948**   | 4    | 9995182                    | <i>SLC2A9</i>         | G/C                | 0.68              | 0.56     | 1.64 (1.45-1.86) | 6.7×10 <sup>-15</sup> | 0.67                            | 0.56     | 1.57 (1.40-1.77) | <b>7.6×10<sup>-14</sup></b> | 1.61 (1.47-1.75)            | <b>5.5×10<sup>-27</sup></b> | 0.63                 | 0                  |
| rs2728125**   | 4    | 89001893                   | <i>ABCG2</i>          | C/T                | 0.40              | 0.25     | 2.05 (1.80-2.34) | 1.5×10 <sup>-27</sup> | 0.40                            | 0.24     | 2.03 (1.79-2.30) | <b>8.3×10<sup>-29</sup></b> | 2.04 (1.86-2.23)            | <b>7.2×10<sup>-54</sup></b> | 0.90                 | 0                  |
| rs6916538     | 6    | 100618009                  | <i>MCHR2-SIM1</i>     | A/G                | 0.51              | 0.44     | 1.34 (1.19-1.51) | 2.0×10 <sup>-6</sup>  | 0.48                            | 0.46     | 1.09 (0.97-1.23) | 0.13                        | 1.21 (0.99-1.48)            | 0.062                       | 1.7×10 <sup>-2</sup> | 82.4               |
| rs731305      | 7    | 157682840                  | <i>PTPRN2</i>         | C/T                | 0.63              | 0.56     | 1.36 (1.20-1.54) | 8.9×10 <sup>-7</sup>  | 0.61                            | 0.61     | 1.02 (0.91-1.15) | 0.70                        | 1.18 (0.89-1.56)            | 0.25                        | 1.1×10 <sup>-3</sup> | 90.7               |
| rs7007064     | 8    | 63099432                   | <i>ASPH-NKAIN3</i>    | A/C                | 0.76              | 0.70     | 1.38 (1.21-1.59) | 3.2×10 <sup>-6</sup>  | 0.73                            | 0.75     | 0.90 (0.79-1.03) | 0.12                        | 1.12 (0.73-1.70)            | 0.61                        | 8.8×10 <sup>-6</sup> | 94.9               |
| rs10791821*** | 11   | 65368323                   | <i>MAP3K11</i>        | G/A                | 0.94              | 0.90     | 1.75 (1.38-2.22) | 2.8×10 <sup>-6</sup>  | 0.94                            | 0.92     | 1.41 (1.12-1.77) | 3.4×10 <sup>-3</sup>        | 1.57 (1.33-1.85)            | 1.0×10 <sup>-7</sup>        | 0.19                 | 41.2               |
| rs4073582**   | 11   | 66050712                   | <i>CNIH-2</i>         | G/A                | 0.95              | 0.91     | 1.78 (1.39-2.29) | 5.3×10 <sup>-6</sup>  | 0.94                            | 0.91     | 1.55 (1.23-1.96) | <b>1.6×10<sup>-4</sup></b>  | 1.66 (1.40-1.96)            | <b>6.4×10<sup>-9</sup></b>  | 0.43                 | 0                  |
| rs11216561    | 11   | 117685575                  | <i>FXYD2-DSCAML1</i>  | C/T                | 0.11              | 0.07     | 1.70 (1.38-2.10) | 7.2×10 <sup>-7</sup>  | 0.10                            | 0.08     | 1.33 (1.09-1.63) | 5.7×10 <sup>-3</sup>        | 1.50 (1.18-1.91)            | 1.0×10 <sup>-3</sup>        | 0.098                | 63.4               |
| rs2188380**   | 12   | 111386127                  | <i>MYL2-CUX2</i>      | T/C                | 0.85              | 0.76     | 1.78 (1.52-2.08) | 5.7×10 <sup>-13</sup> | 0.86                            | 0.78     | 1.73 (1.48-2.02) | <b>2.0×10<sup>-12</sup></b> | 1.75 (1.57-1.96)            | <b>1.6×10<sup>-23</sup></b> | 0.81                 | 0                  |
| rs9806234     | 15   | 74663033                   | <i>CYP11A1-SEMA7A</i> | G/A                | 0.62              | 0.55     | 1.34 (1.18-1.51) | 3.1×10 <sup>-6</sup>  | 0.58                            | 0.58     | 1.02 (0.91-1.15) | 0.70                        | 1.17 (0.90-1.52)            | 0.24                        | 1.9×10 <sup>-3</sup> | 89.7               |
| rs931794      | 15   | 78826180                   | <i>AGPHD1</i>         | A/G                | 0.67              | 0.60     | 1.33 (1.18-1.51) | 6.5×10 <sup>-6</sup>  | 0.64                            | 0.64     | 1.00 (0.89-1.13) | 0.97                        | 1.16 (0.87-1.53)            | 0.31                        | 1.3×10 <sup>-3</sup> | 90.4               |
| rs13755       | 17   | 37223458                   | <i>PLXDC1</i>         | A/G                | 0.17              | 0.13     | 1.47 (1.24-1.73) | 8.3×10 <sup>-6</sup>  | 0.14                            | 0.16     | 0.87 (0.74-1.02) | 0.088                       | 1.13 (0.67-1.88)            | 0.65                        | 1.2×10 <sup>-5</sup> | 94.8               |
| rs242676      | 18   | 58754937                   | <i>MC4R-CDH20</i>     | A/G                | 0.72              | 0.65     | 1.36 (1.19-1.55) | 3.9×10 <sup>-6</sup>  | 0.70                            | 0.69     | 1.01 (0.89-1.14) | 0.88                        | 1.17 (0.88-1.57)            | 0.29                        | 1.3×10 <sup>-3</sup> | 90.4               |

Chr., chromosome; Freq., frequency of A1; OR, odds ratio; CI, confidence interval.

\*dbSNP rs number. SNPs at genome-wide significance levels are marked with "\*\*\*" and a suggestive SNP is marked with "\*\*"

<sup>†</sup>SNP positions are based on NCBI human genome reference sequence Build 37.4.

<sup>‡</sup>A1 is a risk-associated allele and A2 is a non-risk-associated allele.

<sup>§</sup>945 gout cases and 1213 controls.

<sup>||</sup>1048 gout cases and 1334 controls.

<sup>††</sup>The inverse-variance fixed-effects model meta-analysis was used for estimating summary OR. If heterogeneity was present by the statistical test ( $p_{\text{het}} < 0.05$ ) or measure ( $I^2 > 50\%$ ), we performed DerSimonian and Laird random-effects model meta-analysis.

<sup>‡‡</sup>p values smaller than  $3.1 \times 10^{-3}$  (adjusting for 16 tests with Bonferroni correction) in replication study are shown in bold letters. p values smaller than  $5.0 \times 10^{-8}$  in meta-analyses are shown in bold letters.

**Supplementary Table S5** Power of the present study design

| Odds ratio | Minor allele frequency of control |        |        |
|------------|-----------------------------------|--------|--------|
|            | 0.2                               | 0.3    | 0.4    |
| 2.0        | 99.5%                             | 100.0% | 100.0% |
| 1.8        | 92.7%                             | 98.2%  | 99.0%  |
| 1.6        | 57.1%                             | 76.9%  | 83.0%  |
| 1.4        | 8.7%                              | 18.6%  | 24.5%  |

The significance thresholds are calculated to be  $\alpha = 1.0 \times 10^{-5}$  and  $3.1 \times 10^{-3}$  (= 0.05/16) for GWAS and replication stages, respectively.



**Supplementary Table S6A** Imputation analysis near *MYL2-CUX2* locus

| SNP <sup>†</sup> | Chr. | Position (bp) <sup>†</sup> | Gene             | p Value               | r <sup>2‡</sup> |
|------------------|------|----------------------------|------------------|-----------------------|-----------------|
| rs12227162       | 12   | 111367244                  | <i>MYL2-CUX2</i> | $4.4 \times 10^{-14}$ | 0.92            |
| rs149607519      | 12   | 111389437                  | <i>MYL2-CUX2</i> | $6.3 \times 10^{-14}$ | 0.99            |
| rs17550549       | 12   | 111357471                  | <i>MYL2</i>      | $6.4 \times 10^{-14}$ | 0.61            |
| rs10849917       | 12   | 111357074                  | <i>MYL2</i>      | $6.8 \times 10^{-14}$ | 0.60            |
| rs2188380        | 12   | 111386127                  | <i>MYL2-CUX2</i> | $7.2 \times 10^{-14}$ | -               |
| rs7488411        | 12   | 111356598                  | <i>MYL2</i>      | $7.2 \times 10^{-14}$ | 0.60            |
| rs12311834       | 12   | 111354700                  | <i>MYL2</i>      | $7.7 \times 10^{-14}$ | 0.56            |
| rs10849916       | 12   | 111355206                  | <i>MYL2</i>      | $7.7 \times 10^{-14}$ | 0.58            |
| rs3782888        | 12   | 111355606                  | <i>MYL2</i>      | $8.3 \times 10^{-14}$ | 0.60            |
| rs117607209      | 12   | 111354703                  | <i>MYL2</i>      | $8.9 \times 10^{-14}$ | 0.59            |
| rs61943010       | 12   | 111354623                  | <i>MYL2</i>      | $1.1 \times 10^{-13}$ | 0.60            |
| rs11065773       | 12   | 111355100                  | <i>MYL2</i>      | $1.1 \times 10^{-13}$ | 0.60            |
| rs61943000       | 12   | 111354106                  | <i>MYL2</i>      | $1.3 \times 10^{-13}$ | 0.60            |
| rs61942999       | 12   | 111353762                  | <i>MYL2</i>      | $1.3 \times 10^{-13}$ | 0.60            |
| rs2301610        | 12   | 111353556                  | <i>MYL2</i>      | $1.3 \times 10^{-13}$ | 0.60            |
| rs11065747       | 12   | 111326666                  | <i>CCDC63</i>    | $1.3 \times 10^{-13}$ | 0.56            |
| rs2078847        | 12   | 111352478                  | <i>MYL2</i>      | $1.3 \times 10^{-13}$ | 0.60            |
| rs11065770       | 12   | 111351937                  | <i>MYL2</i>      | $1.3 \times 10^{-13}$ | 0.60            |
| rs916164         | 12   | 111351599                  | <i>MYL2</i>      | $1.4 \times 10^{-13}$ | 0.60            |
| rs11065769       | 12   | 111351439                  | <i>MYL2</i>      | $1.4 \times 10^{-13}$ | 0.60            |
| rs2071629        | 12   | 111351186                  | <i>MYL2</i>      | $1.4 \times 10^{-13}$ | 0.60            |
| rs3858704        | 12   | 111705893                  | <i>CUX2</i>      | $3.9 \times 10^{-13}$ | 0.50            |
| rs4766566        | 12   | 111706877                  | <i>CUX2</i>      | $4.0 \times 10^{-13}$ | 0.50            |
| rs11065746       | 12   | 111326655                  | <i>CCDC63</i>    | $5.1 \times 10^{-13}$ | 0.60            |
| rs3825389        | 12   | 111350771                  | <i>MYL2</i>      | $5.4 \times 10^{-13}$ | 0.60            |
| rs3782889        | 12   | 111350655                  | <i>MYL2</i>      | $5.5 \times 10^{-13}$ | 0.60            |
| rs3782890        | 12   | 111350531                  | <i>MYL2</i>      | $5.5 \times 10^{-13}$ | 0.60            |
| rs3782891        | 12   | 111350457                  | <i>MYL2</i>      | $5.6 \times 10^{-13}$ | 0.60            |
| rs11065766       | 12   | 111349849                  | <i>MYL2</i>      | $5.6 \times 10^{-13}$ | 0.60            |
| rs12231049       | 12   | 111349223                  | <i>MYL2</i>      | $5.8 \times 10^{-13}$ | 0.60            |
| rs117139109      | 12   | 111346382                  | <i>CCDC63</i>    | $5.9 \times 10^{-13}$ | 0.59            |
| rs11065750       | 12   | 111331016                  | <i>CCDC63</i>    | $7.2 \times 10^{-13}$ | 0.60            |
| rs11065749       | 12   | 111329227                  | <i>CCDC63</i>    | $7.2 \times 10^{-13}$ | 0.60            |
| rs10774609       | 12   | 111325265                  | <i>CCDC63</i>    | $9.3 \times 10^{-13}$ | 0.59            |
| rs11065751       | 12   | 111331156                  | <i>CCDC63</i>    | $1.0 \times 10^{-12}$ | 0.60            |
| rs10849914       | 12   | 111325437                  | <i>CCDC63</i>    | $1.4 \times 10^{-12}$ | 0.59            |
| rs78900292       | 12   | 111341921                  | <i>CCDC63</i>    | $1.5 \times 10^{-12}$ | 0.59            |

|             |    |           |        |                       |      |
|-------------|----|-----------|--------|-----------------------|------|
| rs117528052 | 12 | 111341920 | CCDC63 | $1.5 \times 10^{-12}$ | 0.59 |
| rs11065752  | 12 | 111331165 | CCDC63 | $1.6 \times 10^{-12}$ | 0.60 |
| rs11065753  | 12 | 111331685 | CCDC63 | $1.6 \times 10^{-12}$ | 0.60 |
| rs7312231   | 12 | 111333224 | CCDC63 | $1.6 \times 10^{-12}$ | 0.60 |
| rs10849915  | 12 | 111333622 | CCDC63 | $1.6 \times 10^{-12}$ | 0.60 |
| rs1858881   | 12 | 111334117 | CCDC63 | $1.7 \times 10^{-12}$ | 0.60 |
| rs6489821   | 12 | 111334318 | CCDC63 | $1.7 \times 10^{-12}$ | 0.60 |
| rs2339598   | 12 | 111341925 | CCDC63 | $1.8 \times 10^{-12}$ | 0.58 |
| rs11065758  | 12 | 111341026 | CCDC63 | $1.8 \times 10^{-12}$ | 0.58 |
| rs6489822   | 12 | 111334375 | CCDC63 | $1.8 \times 10^{-12}$ | 0.60 |
| rs35856328  | 12 | 111335360 | CCDC63 | $1.8 \times 10^{-12}$ | 0.60 |
| rs11065764  | 12 | 111343443 | CCDC63 | $1.8 \times 10^{-12}$ | 0.60 |
| rs11065763  | 12 | 111343000 | CCDC63 | $1.9 \times 10^{-12}$ | 0.60 |
| rs11065762  | 12 | 111342722 | CCDC63 | $1.9 \times 10^{-12}$ | 0.60 |
| rs2283353   | 12 | 111342017 | CCDC63 | $1.9 \times 10^{-12}$ | 0.60 |
| rs146280669 | 12 | 111335756 | CCDC63 | $2.0 \times 10^{-12}$ | 0.60 |
| rs7303257   | 12 | 111324923 | CCDC63 | $2.1 \times 10^{-12}$ | 0.60 |
| rs11610779  | 12 | 111336560 | CCDC63 | $2.2 \times 10^{-12}$ | 0.60 |
| rs7305904   | 12 | 111337891 | CCDC63 | $2.3 \times 10^{-12}$ | 0.60 |
| rs11065756  | 12 | 111338794 | CCDC63 | $2.4 \times 10^{-12}$ | 0.60 |
| rs11065757  | 12 | 111340788 | CCDC63 | $2.4 \times 10^{-12}$ | 0.60 |
| rs10774610  | 12 | 111340243 | CCDC63 | $2.5 \times 10^{-12}$ | 0.60 |
| rs2339717   | 12 | 111696528 | CUX2   | $2.9 \times 10^{-12}$ | 0.48 |
| rs6490029   | 12 | 111698457 | CUX2   | $3.1 \times 10^{-12}$ | 0.48 |
| rs916682    | 12 | 111699146 | CUX2   | $5.1 \times 10^{-12}$ | 0.49 |
| rs11065836  | 12 | 111671076 | CUX2   | $4.4 \times 10^{-9}$  | 0.23 |
| rs2106410   | 12 | 111631946 | CUX2   | $1.4 \times 10^{-7}$  | 0.19 |
| rs4766552   | 12 | 111631765 | CUX2   | $1.4 \times 10^{-7}$  | 0.25 |
| rs4766553   | 12 | 111634281 | CUX2   | $5.5 \times 10^{-7}$  | 0.19 |
| rs56119815  | 12 | 111665521 | CUX2   | $1.4 \times 10^{-6}$  | 0.14 |
| rs3809286   | 12 | 111664404 | CUX2   | $1.7 \times 10^{-6}$  | 0.11 |
| rs4766558   | 12 | 111664061 | CUX2   | $1.9 \times 10^{-6}$  | 0.11 |
| rs7969686   | 12 | 111665388 | CUX2   | $2.4 \times 10^{-6}$  | 0.11 |
| rs7962233   | 12 | 111655513 | CUX2   | $2.7 \times 10^{-6}$  | 0.14 |
| rs10774615  | 12 | 111659096 | CUX2   | $2.8 \times 10^{-6}$  | 0.11 |
| rs4766556   | 12 | 111659074 | CUX2   | $2.9 \times 10^{-6}$  | 0.11 |
| rs3825398   | 12 | 111651949 | CUX2   | $2.9 \times 10^{-6}$  | 0.12 |
| rs10083213  | 12 | 111654363 | CUX2   | $2.9 \times 10^{-6}$  | 0.11 |
| rs11065832  | 12 | 111662984 | CUX2   | $3.5 \times 10^{-6}$  | 0.11 |

|            |    |           |             |                      |      |
|------------|----|-----------|-------------|----------------------|------|
| rs10082818 | 12 | 111663177 | <i>CUX2</i> | $3.5 \times 10^{-6}$ | 0.11 |
| rs7971185  | 12 | 111660599 | <i>CUX2</i> | $3.8 \times 10^{-6}$ | 0.13 |
| rs2339715  | 12 | 111657745 | <i>CUX2</i> | $4.2 \times 10^{-6}$ | 0.13 |
| rs4766559  | 12 | 111666984 | <i>CUX2</i> | $4.6 \times 10^{-6}$ | 0.15 |
| rs3809288  | 12 | 111652522 | <i>CUX2</i> | $4.8 \times 10^{-6}$ | 0.11 |
| rs10744769 | 12 | 111650780 | <i>CUX2</i> | $5.5 \times 10^{-6}$ | 0.11 |
| rs2339716  | 12 | 111680885 | <i>CUX2</i> | $6.5 \times 10^{-6}$ | 0.12 |
| rs3925618  | 12 | 111649686 | <i>CUX2</i> | $7.0 \times 10^{-6}$ | 0.14 |
| rs1034603  | 12 | 111649344 | <i>CUX2</i> | $7.3 \times 10^{-6}$ | 0.14 |
| rs1034602  | 12 | 111649179 | <i>CUX2</i> | $7.4 \times 10^{-6}$ | 0.14 |
| rs4766557  | 12 | 111664044 | <i>CUX2</i> | $8.4 \times 10^{-6}$ | 0.12 |
| rs10774614 | 12 | 111650339 | <i>CUX2</i> | $8.5 \times 10^{-6}$ | 0.13 |
| rs6490037  | 12 | 111713671 | <i>CUX2</i> | $9.9 \times 10^{-6}$ | 0.17 |

Chr., chromosome.

\*dbSNP rs number.

†SNP positions are based on NCBI human genome reference sequence Build 37.4.

‡ $r^2$  indicates the pairwise linkage disequilibrium with rs2188380.

### Supplementary Table S6B Imputation analysis near *GCKR* locus

| SNP*        | Chr. | Position (bp)† | Gene                | p Value              | $r^2$ ‡ |
|-------------|------|----------------|---------------------|----------------------|---------|
| rs1260326   | 2    | 27730940       | <i>GCKR</i>         | $1.7 \times 10^{-7}$ | -       |
| rs814295    | 2    | 27743215       | <i>GCKR</i>         | $1.1 \times 10^{-6}$ | 0.48    |
| rs6744393   | 2    | 27750139       | <i>GCKR</i>         | $1.1 \times 10^{-6}$ | 0.48    |
| rs74928908  | 2    | 27744089       | <i>GCKR</i>         | $1.2 \times 10^{-6}$ | 0.47    |
| rs780092    | 2    | 27743154       | <i>GCKR</i>         | $1.2 \times 10^{-6}$ | 0.47    |
| rs78680773  | 2    | 27751562       | <i>GCKR</i>         | $1.2 \times 10^{-6}$ | 0.45    |
| rs3817588   | 2    | 27731212       | <i>GCKR</i>         | $1.4 \times 10^{-6}$ | 0.50    |
| rs780093    | 2    | 27742603       | <i>GCKR</i>         | $2.1 \times 10^{-6}$ | 0.88    |
| rs1313566   | 2    | 27748904       | <i>GCKR</i>         | $2.3 \times 10^{-6}$ | 0.88    |
| rs182700961 | 2    | 27781772       | <i>GCKR-C2orf16</i> | $3.2 \times 10^{-6}$ | 0.22    |
| rs780094    | 2    | 27741237       | <i>GCKR</i>         | $3.2 \times 10^{-6}$ | 0.92    |
| rs6547692   | 2    | 27734972       | <i>GCKR</i>         | $3.5 \times 10^{-6}$ | 0.93    |
| rs62131879  | 2    | 27755112       | <i>GCKR</i>         | $3.5 \times 10^{-6}$ | 0.23    |
| rs10181342  | 2    | 27757343       | <i>GCKR</i>         | $3.6 \times 10^{-6}$ | 0.23    |
| rs116443177 | 2    | 27764122       | <i>GCKR</i>         | $3.6 \times 10^{-6}$ | 0.23    |
| rs62131881  | 2    | 27764781       | <i>GCKR</i>         | $3.7 \times 10^{-6}$ | 0.23    |
| rs62131882  | 2    | 27765480       | <i>GCKR</i>         | $3.7 \times 10^{-6}$ | 0.23    |
| rs62141278  | 2    | 27768381       | <i>GCKR</i>         | $3.8 \times 10^{-6}$ | 0.23    |
| rs780096    | 2    | 27741072       | <i>GCKR</i>         | $3.8 \times 10^{-6}$ | 0.92    |

|            |   |          |              |                      |      |
|------------|---|----------|--------------|----------------------|------|
| rs780095   | 2 | 27741105 | GCKR         | $3.8 \times 10^{-6}$ | 0.92 |
| rs62141279 | 2 | 27771415 | GCKR-C2orf16 | $3.9 \times 10^{-6}$ | 0.24 |
| rs62141281 | 2 | 27777651 | GCKR-C2orf16 | $4.1 \times 10^{-6}$ | 0.23 |
| rs2384627  | 2 | 27774449 | GCKR-C2orf16 | $4.2 \times 10^{-6}$ | 0.23 |
| rs6751087  | 2 | 27778016 | GCKR-C2orf16 | $4.2 \times 10^{-6}$ | 0.23 |
| rs1881396  | 2 | 27844601 | ZNF512       | $4.8 \times 10^{-6}$ | 0.24 |
| rs13405762 | 2 | 27834615 | ZNF512       | $5.3 \times 10^{-6}$ | 0.23 |
| rs78170284 | 2 | 27835082 | ZNF512       | $5.4 \times 10^{-6}$ | 0.23 |
| rs1881395  | 2 | 27838549 | ZNF512       | $5.4 \times 10^{-6}$ | 0.23 |
| rs7571558  | 2 | 27839832 | ZNF512       | $5.4 \times 10^{-6}$ | 0.23 |
| rs62138971 | 2 | 27840754 | ZNF512       | $5.4 \times 10^{-6}$ | 0.23 |
| rs6547735  | 2 | 27831607 | ZNF512       | $5.7 \times 10^{-6}$ | 0.23 |
| rs6719960  | 2 | 27830067 | ZNF512       | $5.7 \times 10^{-6}$ | 0.23 |
| rs2141372  | 2 | 27827196 | ZNF512       | $5.7 \times 10^{-6}$ | 0.23 |
| rs62138968 | 2 | 27824485 | ZNF512       | $5.7 \times 10^{-6}$ | 0.23 |
| rs56725354 | 2 | 27824168 | ZNF512       | $5.7 \times 10^{-6}$ | 0.23 |
| rs1919129  | 2 | 27818721 | ZNF512       | $5.8 \times 10^{-6}$ | 0.23 |
| rs62138966 | 2 | 27819172 | ZNF512       | $5.8 \times 10^{-6}$ | 0.23 |
| rs62138965 | 2 | 27816593 | ZNF512       | $5.8 \times 10^{-6}$ | 0.23 |
| rs76013440 | 2 | 27816315 | ZNF512       | $5.8 \times 10^{-6}$ | 0.23 |
| rs1881397  | 2 | 27832285 | ZNF512       | $5.9 \times 10^{-6}$ | 0.23 |
| rs60854669 | 2 | 27786929 | GCKR-C2orf16 | $6.1 \times 10^{-6}$ | 0.23 |
| rs965813   | 2 | 27789861 | GCKR-C2orf16 | $6.2 \times 10^{-6}$ | 0.23 |
| rs59876138 | 2 | 27792323 | GCKR-C2orf16 | $6.2 \times 10^{-6}$ | 0.23 |
| rs6704596  | 2 | 27796927 | GCKR-C2orf16 | $6.3 \times 10^{-6}$ | 0.23 |
| rs62138964 | 2 | 27814438 | ZNF512       | $6.3 \times 10^{-6}$ | 0.23 |
| rs62138963 | 2 | 27814374 | ZNF512       | $6.3 \times 10^{-6}$ | 0.23 |
| rs3811644  | 2 | 27802805 | C2orf16      | $6.3 \times 10^{-6}$ | 0.23 |
| rs6734059  | 2 | 27808154 | ZNF512       | $6.5 \times 10^{-6}$ | 0.23 |
| rs62141291 | 2 | 27784034 | GCKR-C2orf16 | $6.6 \times 10^{-6}$ | 0.23 |
| rs62141292 | 2 | 27784300 | GCKR-C2orf16 | $6.6 \times 10^{-6}$ | 0.23 |
| rs62141290 | 2 | 27783392 | GCKR-C2orf16 | $9.2 \times 10^{-6}$ | 0.22 |

Chr., chromosome.

<sup>†</sup>dbSNP rs number.

<sup>†</sup>SNP positions are based on NCBI human genome reference sequence Build 37.4.

<sup>‡</sup> $r^2$  indicates the pairwise linkage disequilibrium with rs1260326.

**Supplementary Table S6C** Imputation analysis near *CNIH-2* locus

| SNP*      | Chr. | Position (bp) <sup>†</sup> | Gene          | p Value                | r <sup>2‡</sup> |
|-----------|------|----------------------------|---------------|------------------------|-----------------|
| rs524859  | 11   | 66041079                   | <i>RAB1B</i>  | 3.9 × 10 <sup>-6</sup> | 1.00            |
| rs4073582 | 11   | 66050712                   | <i>CNIH-2</i> | 4.8 × 10 <sup>-6</sup> | -               |
| rs801742  | 11   | 65914766                   | <i>PACS1</i>  | 6.9 × 10 <sup>-6</sup> | 0.96            |

Chr., chromosome.

\*dbSNP rs number.

<sup>†</sup>SNP positions are based on NCBI human genome reference sequence Build 37.4.

<sup>‡</sup>r<sup>2</sup> indicates the pairwise linkage disequilibrium with rs4073582.

**Supplementary Table S6D** Imputation analysis near *MAP3K11* locus

| SNP*       | Chr. | Position (bp) <sup>†</sup> | Gene           | p Value                | r <sup>2‡</sup> |
|------------|------|----------------------------|----------------|------------------------|-----------------|
| rs11227230 | 11   | 65356674                   | <i>EHBP1L1</i> | 1.2 × 10 <sup>-6</sup> | 0.96            |
| rs1151503  | 11   | 65357697                   | <i>EHBP1L1</i> | 1.3 × 10 <sup>-6</sup> | 0.96            |
| rs4326800  | 11   | 65367253                   | <i>MAP3K11</i> | 1.9 × 10 <sup>-6</sup> | 1.00            |
| rs10791821 | 11   | 65368323                   | <i>MAP3K11</i> | 1.9 × 10 <sup>-6</sup> | -               |
| rs34278912 | 11   | 65360243                   | <i>KCNK7</i>   | 2.0 × 10 <sup>-6</sup> | 0.91            |

Chr., chromosome.

\*dbSNP rs number.

<sup>†</sup>SNP positions are based on NCBI human genome reference sequence Build 37.4.

<sup>‡</sup>r<sup>2</sup> indicates the pairwise linkage disequilibrium with rs10791821.

**Supplementary Table S7A** Univariate and multivariate logistic regression including three SNPs of *ABCG2*

| SNP*       | Univariate         |                       | Multivariate       |                       |
|------------|--------------------|-----------------------|--------------------|-----------------------|
|            | OR (95% CI)        | p Value <sup>†</sup>  | OR (95% CI)        | p Value <sup>†</sup>  |
| rs2728125  | 2.06 (1.84 - 2.30) | $2.3 \times 10^{-36}$ | 0.85 (0.68 - 1.08) | 0.19                  |
| rs72552713 | 2.18 (1.63 - 2.92) | $1.4 \times 10^{-7}$  | 2.95 (2.18 - 3.98) | $1.9 \times 10^{-12}$ |
| rs2231142  | 2.35 (2.11 - 2.63) | $2.9 \times 10^{-51}$ | 2.83 (2.24 - 3.57) | $1.8 \times 10^{-18}$ |

OR, odds ratio; CI, confidence interval.

\*dbSNP rs number.

<sup>†</sup>We analyzed 1993 cases and 1334 controls whose genotype data for rs72552713 and rs223114 were available.

**Supplementary Table S7B** Association analysis of gout with *ABCG2* dysfunctional missense variants

| SNP*       | Chr. | Position (bp) <sup>†</sup> | Amino Acid change | A1/A2 <sup>‡</sup> | Freq. |          | OR (95% CI) <sup>d</sup> | p Value <sup>§</sup>  |
|------------|------|----------------------------|-------------------|--------------------|-------|----------|--------------------------|-----------------------|
|            |      |                            |                   |                    | Cases | Controls |                          |                       |
| rs72552713 | 4    | 89052957                   | Gln126Ter         | T/C                | 0.049 | 0.023    | 2.86 (2.12 - 3.85)       | $4.4 \times 10^{-12}$ |
| rs2231142  | 4    | 89052323                   | Gln141Lys         | A/C                | 0.46  | 0.27     | 2.47 (2.20 - 2.76)       | $1.6 \times 10^{-55}$ |

Chr., chromosome; Freq., frequency of A1; OR, odds ratio; CI, confidence interval.

\*dbSNP rs number.

<sup>†</sup>SNP positions are based on NCBI human genome reference sequence Build 37.4.

<sup>‡</sup>A1 is a risk-associated allele and A2 is a non-risk-associated allele.

<sup>§</sup>We analyzed 1993 cases and 1334 controls whose genotype data for these two SNPs were available. Logistic regression analyses were performed using a multivariate model including two SNPs, which located on different haplotypes.

**Supplementary Table S8** Magnitude of gout risk associated with the number of risk alleles

| Risk allele No. | Cases | Controls | OR (95% CI) <sup>a</sup> | p Value*              |
|-----------------|-------|----------|--------------------------|-----------------------|
| 4 or less       | 45    | 134      | Reference                |                       |
| 5               | 148   | 246      | 1.79 (1.21 - 2.66)       | $3.5 \times 10^{-3}$  |
| 6               | 377   | 355      | 3.16 (2.19 - 4.57)       | $2.3 \times 10^{-10}$ |
| 7               | 548   | 320      | 5.10 (3.54 - 7.34)       | $9.7 \times 10^{-21}$ |
| 8               | 507   | 149      | 10.1 (6.90 - 14.9)       | $5.3 \times 10^{-39}$ |
| 9 or more       | 265   | 46       | 18.6 (11.8 - 29.2)       | $3.6 \times 10^{-45}$ |

OR, odds ratio; CI, confidence interval.

\*We analyzed 1937 cases and 1254 controls whose genotype data for the following six SNPs were available: rs3775948 of *SLC2A9*, rs2188380 of *MYL2-CUX2*, rs1260326 of *GCKR*, rs4073582 of *CNIH-2*, rs72552713 and rs2231142 of *ABCG2*.

**Supplementary Table S9** Association analysis between seven SNPs and three uric acid-related parameters

| SNP*       | Gene             | SUA <sup>†</sup> |        |       |                              | FE <sub>UA</sub> <sup>‡</sup> |        |        |                              | UUE <sup>‡</sup> |        |        |                              |
|------------|------------------|------------------|--------|-------|------------------------------|-------------------------------|--------|--------|------------------------------|------------------|--------|--------|------------------------------|
|            |                  | Coef.            | 95% CI |       | p Value <sup>§</sup>         | Coef.                         | 95% CI |        | p Value <sup>§</sup>         | Coef.            | 95% CI |        | p Value <sup>§</sup>         |
|            |                  |                  | LL     | UL    |                              |                               | LL     | UL     |                              |                  | LL     | UL     |                              |
| rs3775948  | <i>SLC2A9</i>    | 0.166            | 0.076  | 0.256 | <b>3.1 × 10<sup>-4</sup></b> | -0.260                        | -0.368 | -0.152 | <b>2.6 × 10<sup>-6</sup></b> | -0.809           | -1.482 | -0.136 | <b>0.018</b>                 |
| rs2188380  | <i>MYL2-CUX2</i> | 0.074            | -0.048 | 0.196 | 0.23                         | -0.141                        | -0.288 | 0.006  | 0.06                         | 0.480            | -0.437 | 1.396  | 0.30                         |
| rs1260326  | <i>GCKR</i>      | 0.063            | -0.019 | 0.146 | 0.13                         | -0.064                        | -0.164 | 0.034  | 0.20                         | 0.127            | -0.490 | 0.745  | 0.69                         |
| rs4073582  | <i>CNIH-2</i>    | -0.008           | -0.187 | 0.171 | 0.93                         | -0.030                        | -0.245 | 0.184  | 0.78                         | 0.224            | -1.115 | 1.562  | 0.74                         |
| rs10791821 | <i>MAP3K11</i>   | 0.032            | -0.145 | 0.208 | 0.72                         | -0.076                        | -0.288 | 0.135  | 0.48                         | -0.792           | -2.109 | 0.525  | 0.24                         |
| rs72552713 | <i>ABCG2</i>     | 0.402            | 0.210  | 0.594 | <b>4.3 × 10<sup>-5</sup></b> | 0.348                         | 0.116  | 0.579  | <b>3.3 × 10<sup>-3</sup></b> | 2.780            | 1.338  | 4.222  | <b>1.6 × 10<sup>-4</sup></b> |
| rs2231142  | <i>ABCG2</i>     | 0.183            | 0.098  | 0.268 | <b>2.6 × 10<sup>-5</sup></b> | 0.244                         | 0.142  | 0.346  | <b>3.2 × 10<sup>-6</sup></b> | 1.862            | 1.224  | 2.500  | <b>1.2 × 10<sup>-8</sup></b> |

SUA, serum uric acid (unit: mg/dl); FE<sub>UA</sub>, fractional excretion of urate clearance (unit: %); UUE, urinary urate excretion (unit: mg/hr/1.73m<sup>2</sup>); Coef., regression coefficient; CI, confidence interval; LL, lower limit; UL, upper limit. We performed multivariate linear regression analyses, in which all 7 SNPs, alcohol drinking and BMI were included in the model.

\*dbSNP rs number.

<sup>†</sup>Among 1657 gout patients with records of SUA, 1616 patients with complete information on all the explanatory variables were analyzed.

<sup>‡</sup>Among 1613 gout patients with records of FE<sub>UA</sub> and UUE, 1574 patients with complete information on all the explanatory variables were analyzed.

<sup>§</sup>p values smaller than 0.05 are shown in bold letters.



**Supplementary Table S10** Linkage disequilibrium among rs4073582 of *CNIH-2*, rs10791821 of *MAP3K11*, and rs504915 of *NRXN2*

|    |                               | $r^2$                       |                               |                           |
|----|-------------------------------|-----------------------------|-------------------------------|---------------------------|
|    |                               | rs4073582 ( <i>CNIH-2</i> ) | rs10791821 ( <i>MAP3K11</i> ) | rs504915 ( <i>NRXN2</i> ) |
| D' | rs4073582 ( <i>CNIH-2</i> )   |                             | 0.010                         | 0.006                     |
|    | rs10791821 ( <i>MAP3K11</i> ) | 0.124                       |                               | 0.189                     |
|    | rs504915 ( <i>NRXN2</i> )     | 0.728                       | 0.649                         |                           |

**Supplementary Table S11** Multivariate logistic regression analysis adjusted with rs504915 of *NRXN2*

| SNP*       | Gene           | Univariate           |                  | Multivariate <sup>†</sup> |                  |
|------------|----------------|----------------------|------------------|---------------------------|------------------|
|            |                | p Value              | OR (95% CI)      | p Value                   | OR (95% CI)      |
| rs4073582  | <i>CNIH-2</i>  | 1.6×10 <sup>-4</sup> | 1.55 (1.23-1.96) | 3.3×10 <sup>-4</sup>      | 1.55 (1.22-1.96) |
| rs10791821 | <i>MAP3K11</i> | 3.4×10 <sup>-3</sup> | 1.41 (1.12-1.77) | 2.4×10 <sup>-3</sup>      | 1.44 (1.14-1.82) |

OR, odds ratio; CI, confidence interval.

\*dbSNP rs number.

<sup>†</sup>We performed multivariate logistic regression analyses using replication stage samples. These data were adjusted with rs504915 of *NRXN2*.

## Supplementary Methods

### Genotyping and quality control

At GWAS stage, the data sets were filtered individually on the basis of single nucleotide polymorphism (SNP) genotype missing call rates (>1%), and the Hardy-Weinberg equilibrium (HWE) in controls ( $p < 1.0 \times 10^{-6}$ ). We confirmed that all the subjects showed high genotype call rates (>98%). Pairwise identity by state was evaluated in order to identify pairs of individuals with cryptic relatedness. We confirmed that there was no pair showing cryptic relatedness greater than expected for second-degree relatives. We performed principal component analysis including our GWAS data set together with HapMap phase II samples.<sup>1,2</sup> As a result, we excluded one gout patient as a population outlier who was presumed to be of mixed origin (East Asian and European) (supplementary figure S2). Finally, 570 442 SNPs passed filters for 945 cases and 1213 controls.

One hundred twenty-three SNPs passing the significance threshold at  $p < 1.0 \times 10^{-5}$  in the GWAS stage were used for the subsequent analyses. For closely located SNPs, we detected top-ranked SNPs and then we examined the pairwise linkage disequilibrium (LD) between SNP showing the most significant association and other SNPs. For each novel risk locus, we confirmed that all of the SNPs showing associations at  $p < 1.0 \times 10^{-5}$  were in moderate to strong LD ( $r^2 > 0.3$ ) with SNP showing the most significant association. Furthermore, these SNPs were no longer significant at  $p < 1.0 \times 10^{-5}$  after adjusting for the most significantly associated SNP in each locus by the logistic regression analyses. Finally, we selected 16 SNPs for replication study. We genotyped these SNPs and confirmed that all the 16 SNPs were of high call rate (>98%) and did not show significant deviation from HWE in controls ( $p > 0.05$ ).

### Statistical analyses for GWAS

We conducted an association analysis using a 2×2 contingency table based on the allele frequency. For each of the filtered SNPs, p value of association was assessed by  $\chi^2$  test, and the odds ratio (OR) and 95% confidence interval (95% CI) were calculated. The quantile-quantile plot and the genomic inflation factor ( $\lambda$ ) were used to assess the presence of systematic bias in the test statistics due to potential population stratification. After excluding SNPs within 500 kb from the SNPs reaching a genome-wide significance threshold ( $p < 5.0 \times 10^{-8}$ ), the  $\lambda$  was 1.054, indicating a subtle inflation of p values (supplementary figure S3).

### Imputation

For the imputation, the 1000 genomes reference panel (the East Asian population) was obtained from the phase 1 release (16 March 2012, <http://www.1000genomes.org/announcements/updated-integrated-phase-1-release-calls-2012-03-16>), and we ran a logistic regression analysis based on imputation dosages via MACH2DAT.<sup>3</sup> We included all SNPs with estimated  $r^2 > 0.9$  and minor allele frequency  $\geq 0.01$  for analysis.

### Analysis of the two dysfunctional SNPs of *ABCG2*

The genotyping of the two *ABCG2* SNPs (rs72552713 and rs2231142) was performed with an allelic discrimination assay (Custom TaqMan Assay, Applied Biosystems) with a LightCycler 480 (Roche

Diagnostics).<sup>4</sup> All the logistic regression analyses were performed with a software SPSS v.22.0J (IBM Japan Inc.). A software R (version 3.0.2) (<http://www.r-project.org/>) with GenABEL software package was used for LD analysis.

### **Estimation of variance explained by identified SNPs**

For each variant identified in our GWAS, we calculated percent of the variance explained. We used the liability threshold model in quantitative genetics.<sup>5</sup> In this model, it is assumed that liability of a binary disease trait on unobserved continuous scale is assumed to be normally distributed with a mean of zero and variance of one, and individuals whose liabilities surpass a threshold develop the disease. To calculate the percent variance explained, we assumed that the prevalence of gout was 1.1% based on the estimation in Japanese male population.<sup>4,6</sup> We assumed that SNP effects were additive on the logistic scale. Under the rare disease assumption, we approximated the relative risk by the odds ratio obtained in this study. For the identified SNPs, we used the allele frequencies in the East Asian population in the 1000 Genomes Project.<sup>7</sup>

### **Subtype analysis**

We investigated the magnitude of associations between the identified SNPs and the types of gout by examining type-specific ORs and the case-subtype heterogeneity test. Fractional excretion of urate clearance ( $FE_{UA}$ ) and urinary urate excretion (UUE) were measured for each patient as described previously,<sup>8</sup> and all cases were classified based on the criteria (supplementary figure S1). To estimate gout type-specific ORs, the frequency of a SNP in each type was compared with the frequency in controls using a logistic regression. To assess whether the estimated type-specific ORs were significantly different, the frequencies of the SNP were compared between types by dichotomous logistic regression (the case-subtype heterogeneity test).<sup>9</sup> For these subtype analyses, the effects of alcohol drinking, body mass index (BMI), and all the identified SNPs were considered in the model. When evaluating the effects of risk allele of SNP on clinical parameters ( $FE_{UA}$  and UUE), a linear regression analysis was performed by defining the SNP genotype predictor variable  $x$  as the number of risk alleles associated with gout risk. All the logistic and linear regression analyses were performed using the STATA version 11.0.

### **References for Supplementary Methods**

- 1 Patterson N, Price AL, Reich D. Population structure and eigenanalysis. *PLoS Genet* 2006;2:e190.
- 2 Price AL, Patterson NJ, Plenge RM, *et al.* Principal components analysis corrects for stratification in genome-wide association studies. *Nat Genet* 2006;38:904-9.
- 3 Li Y, Willer C, Sanna S, *et al.* Genotype imputation. *Annu Rev Genomics Hum Genet* 2009;10:387-406.
- 4 Matsuo H, Takada T, Ichida K, *et al.* Common defects of ABCG2, a high-capacity urate exporter, cause gout: a function-based genetic analysis in a Japanese population. *Sci Transl Med* 2009;1:5ra11.
- 5 Falconer DS, Mackay TFC. Introduction to Quantitative Genetics. 4 ed. Harlow, Essex, UK:

Longmans Green, 1996.

- 6 Hakoda M. Epidemiology of hyperuricemia and gout in Japan. *Nippon Rinsho (in Japanese)* 2008;66:647-52.
- 7 Abecasis GR, Altshuler D, Auton A, *et al.* A map of human genome variation from population-scale sequencing. *Nature* 2010;467:1061-73.
- 8 Ichida K, Matsuo H, Takada T, *et al.* Decreased extra-renal urate excretion is a common cause of hyperuricemia. *Nat Commun* 2012;3:764.
- 9 Nakaoka H, Takahashi T, Akiyama K, *et al.* Differential effects of chromosome 9p21 variation on subphenotypes of intracranial aneurysm: site distribution. *Stroke* 2010;41:1593-8.
